# Supplementary material
Source: PubMed Central journal article supplement (PMC7112151)

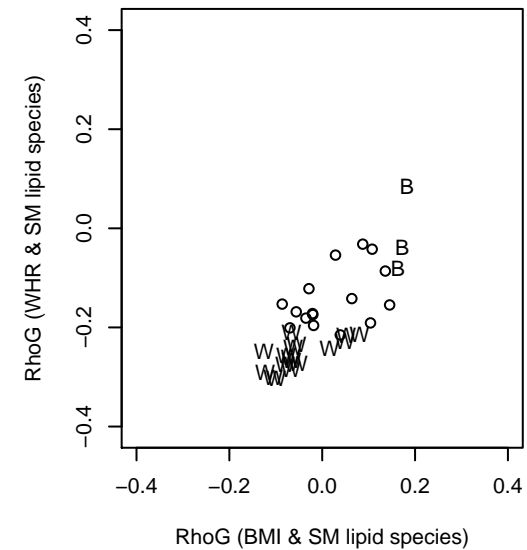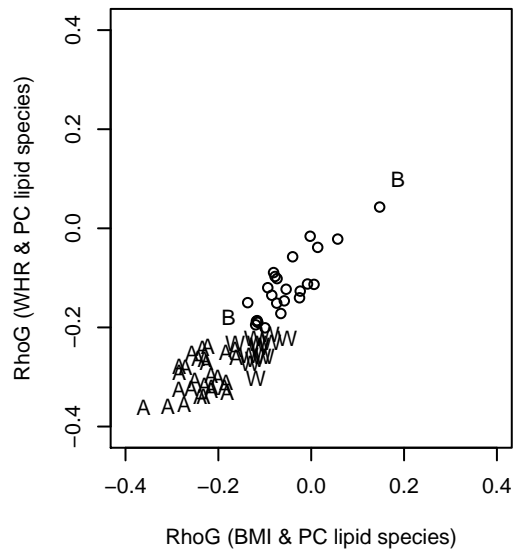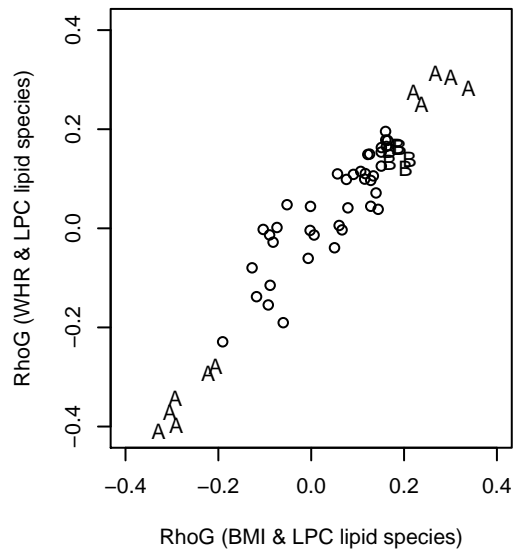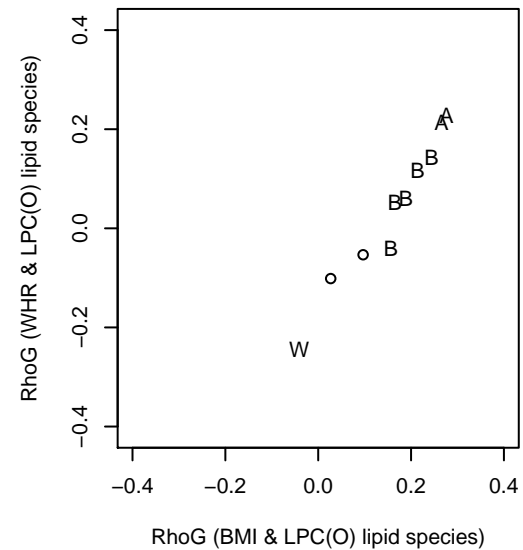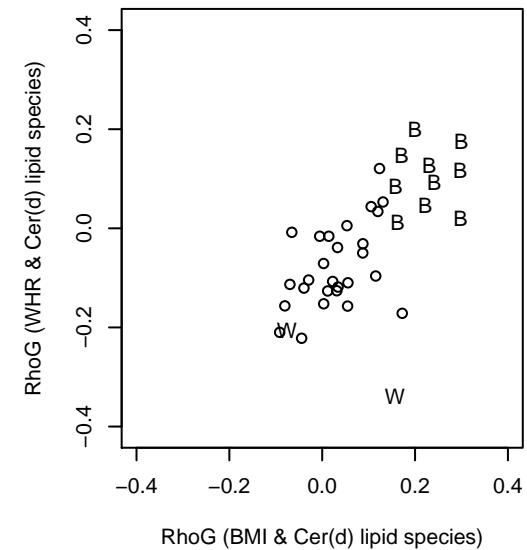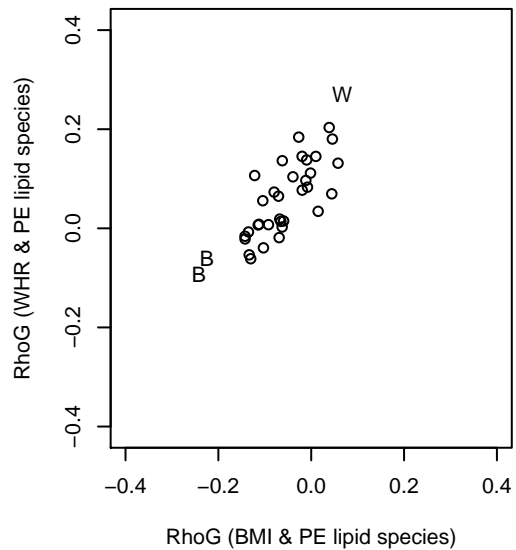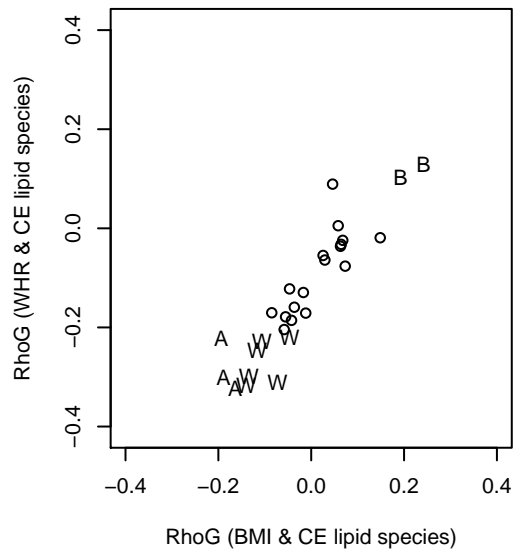

Supplement: supp_RA119000594_157853_1_supp_473346_q5tq1v.pdf [file supp_RA119000594_157853_1_supp_473346_q5tq1v.pdf]
